# Supplementary figures and images for: Elevated Ozone Concentration and Nitrogen Addition Increase Poplar Rust Severity by Shifting the Phyllosphere Microbial Community
Source: MDPI journal article supplement (doi:10.3390/jof8050523), 2022-05-18

## Bacteria

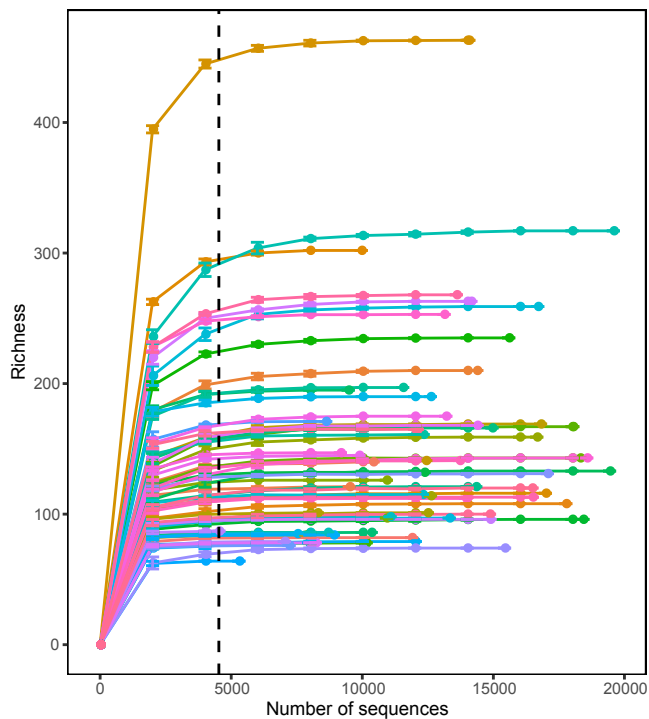

## Fungi

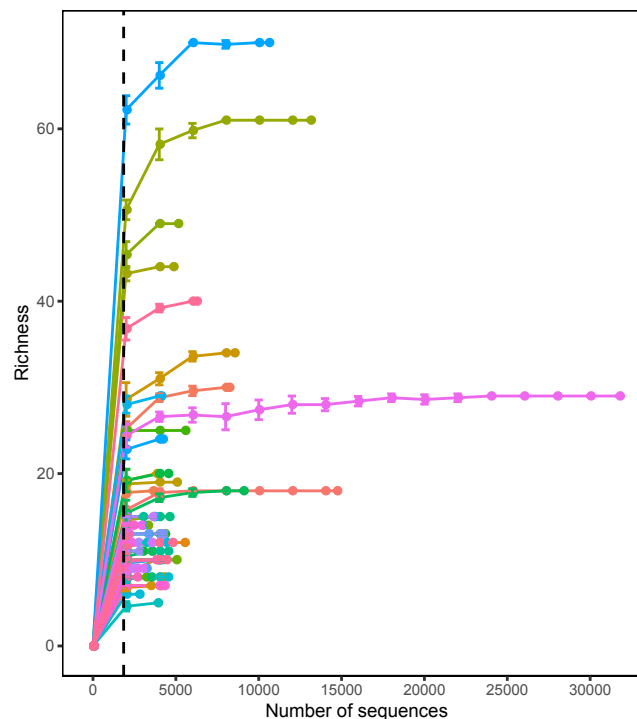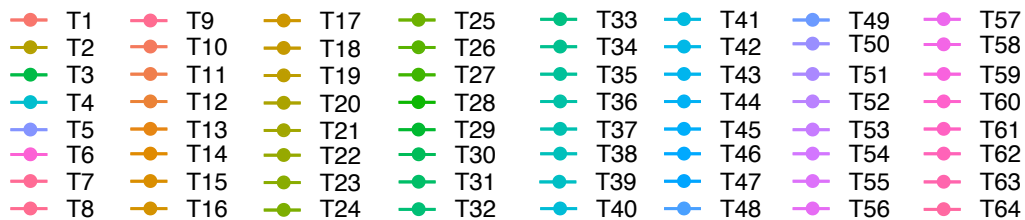

Supplement: s1 [file s1]

A-O<sub>3</sub>

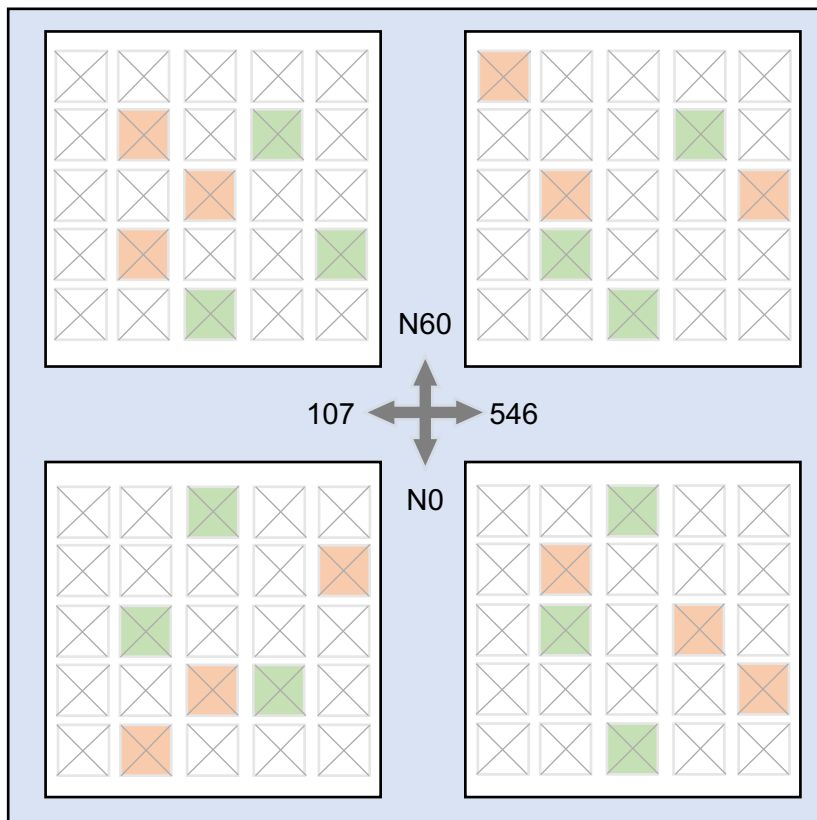

E-O<sub>3</sub>

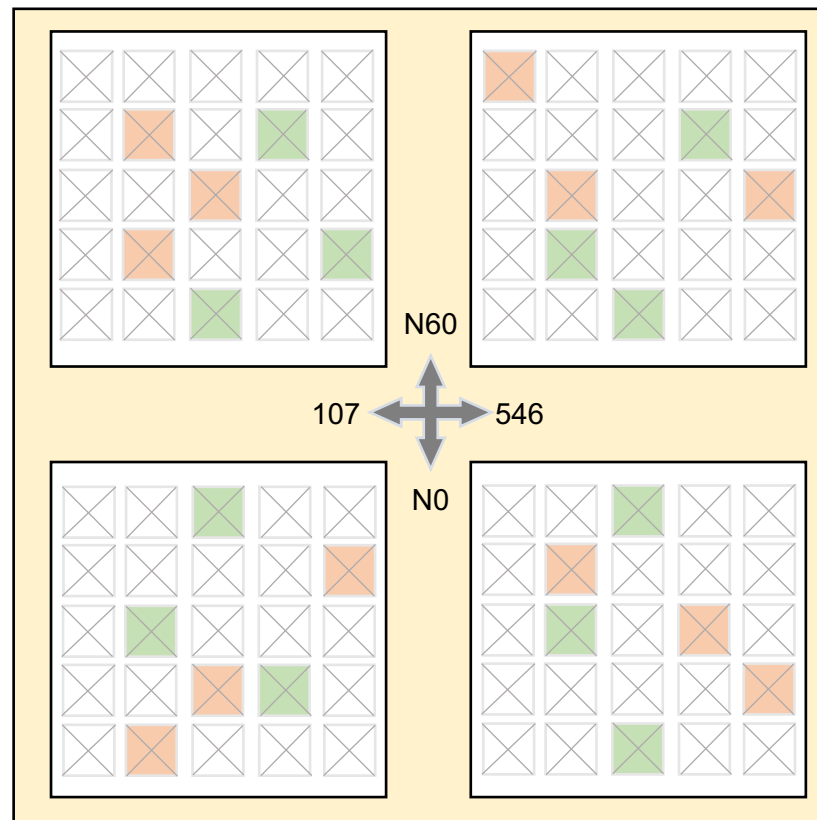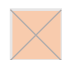

Rust-infected poplars

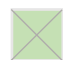

Non-infected poplars

Supplement: s1 [file s1]

**a** Bacteria beta-diversity

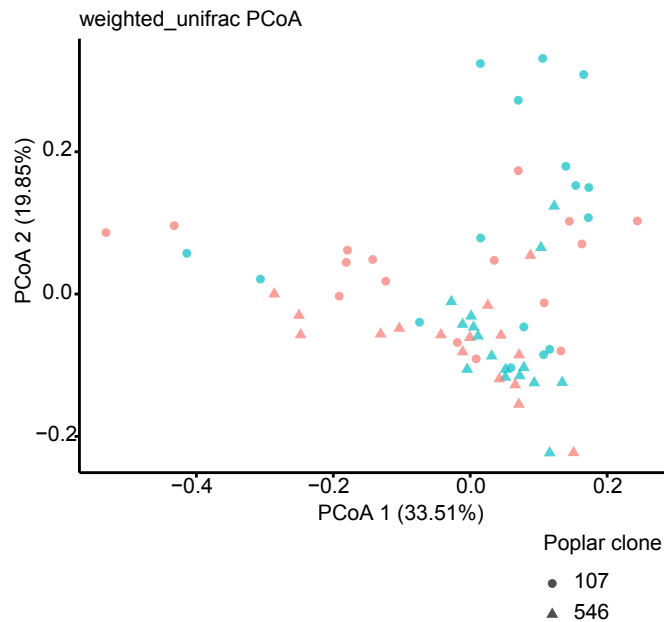

**b** Fungi beta-diversity

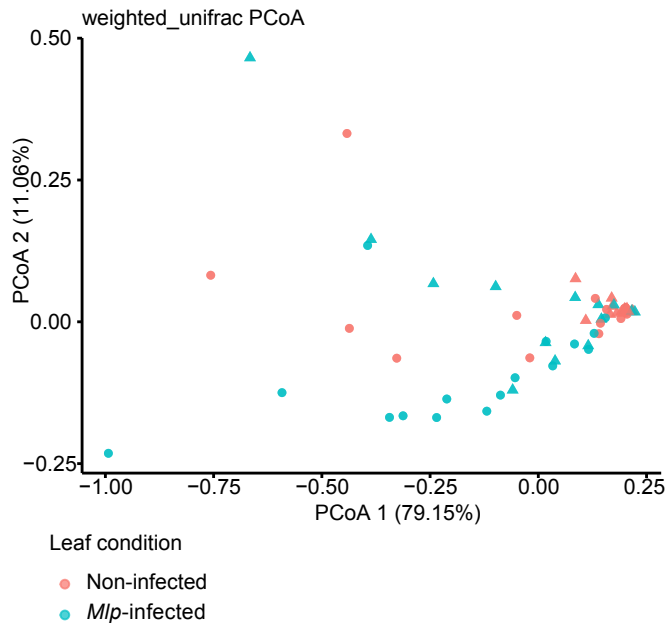

Supplement: s1 [file s1]
